# A Natural Plasmid Uniquely Encodes Two Biosynthetic Pathways Creating a Potent Anti-MRSA Antibiotic

Daisuke Fukuda<sup>1</sup>\*, Anthony S. Haines<sup>1</sup>\*, Zhongshu Song<sup>2</sup>, Annabel C. Murphy<sup>2</sup>, Joanne Hothersall<sup>1</sup>, Elton R. Stephens<sup>1</sup>, Rachel Gurney<sup>1</sup>, Russell J. Cox<sup>2</sup>, John Crosby<sup>2</sup>, Christine L. Willis<sup>2</sup>, Thomas J. Simpson<sup>2</sup>, Christopher M. Thomas<sup>1</sup>\*

<sup>1</sup> School of Biosciences, University of Birmingham, Edgbaston, Birmingham, United Kingdom, <sup>2</sup> School of Chemistry, University of Bristol, Cantock's Close, Bristol, United Kingdom

## Abstract

**Background:** Understanding how complex antibiotics are synthesised by their producer bacteria is essential for creation of new families of bioactive compounds. Thiomarinols, produced by marine bacteria belonging to the genus *Pseudoalteromonas*, are hybrids of two independently active species: the pseudomonic acid mixture, mupirocin, which is used clinically against MRSA, and the pyrrothine core of holomycin.

**Methodology/Principal Findings:** High throughput DNA sequencing of the complete genome of the producer bacterium revealed a novel 97 kb plasmid, pTML1, consisting almost entirely of two distinct gene clusters. Targeted gene knockouts confirmed the role of these clusters in biosynthesis of the two separate components, pseudomonic acid and the pyrrothine, and identified a putative amide synthetase that joins them together. Feeding mupirocin to a mutant unable to make the endogenous pseudomonic acid created a novel hybrid with the pyrrothine via "mutasynthesis" that allows inhibition of mupirocin-resistant isoleucyl-tRNA synthetase, the mupirocin target. A mutant defective in pyrrothine biosynthesis was also able to incorporate alternative amine substrates.

**Conclusions/Significance:** Plasmid pTML1 provides a paradigm for combining independent antibiotic biosynthetic pathways or using mutasynthesis to develop a new family of hybrid derivatives that may extend the effective use of mupirocin against MRSA.

**Citation:** Fukuda D, Haines AS, Song Z, Murphy AC, Hothersall J, et al. (2011) A Natural Plasmid Uniquely Encodes Two Biosynthetic Pathways Creating a Potent Anti-MRSA Antibiotic. PLoS ONE 6(3): e18031. doi:10.1371/journal.pone.0018031

**Editor:** Alfred Lewin, University of Florida, United States of America

**Received:** December 22, 2010; **Accepted:** February 18, 2011; **Published:** March 31, 2011

**Copyright:** © 2011 Fukuda et al. This is an open-access article distributed under the terms of the Creative Commons Attribution License, which permits unrestricted use, distribution, and reproduction in any medium, provided the original author and source are credited.

**Funding:** This work was funded by BBSRC/EPSRC grant E021611. LCMS equipment was funded by EPSRC grant EP/F066104. Daisuke Fukuda was funded to work on this project in Birmingham by the company Daiichi-Sankyo, which also made a financial contribution to the running costs of the project. The funders had no role in study design, data collection and analysis, decision to publish, or preparation of the manuscript.

**Competing Interests:** This work was funded by a grant from the UK Research Councils BBSRC and EPSRC. Daisuke Fukuda was still an employee of the company Daiichi-Sankyo while he was seconded to the University of Birmingham.

\* E-mail: C.M.THOMAS@bham.ac.uk

† These authors contributed equally to this work.

## Introduction

The inexorable rise of antibiotic resistance in clinically important bacteria makes it vital not only to identify new classes of antimicrobial compounds but also to develop new derivatives of existing compounds that can extend their effective use. Thiomarinols [1–4], produced by marine bacteria, form a novel family of natural compounds with potent antimicrobial activity. They consist of two components each related to independent antibiotics: the clinically important anti-methicillin resistant *Staphylococcus aureus* (MRSA) antibiotic mupirocin in which a polyketide moiety, monic acid, is esterified by an unusual fatty acid component, 9-hydroxynonanoic acid [5,6]; and a pyrrothine moiety, previously found in the antibiotic holomycin [7] and related compounds. In thiomarinol the pyrrothine is attached via an amide linkage to an 8-hydroxyoctanoic acid side-chain in the mupirocin-like component, called marinolic acid by analogy with mupirocin's more generic name, pseudomonic acid (Figure 1).

The mupirocin biosynthetic (*mup*) gene cluster from the soil and plant root-associated bacterium *Pseudomonas fluorescens* was sequenced

some time ago [5] and many of the key steps of the biosynthetic pathways have been worked out over the last 10 years [6]. When this project started the genes responsible for holomycin production by the producer organism *Streptomyces clavuligerus* [8] were not known but very recently the identification of the gene cluster and the analysis of key steps in the pathway have been described [9]. Mupirocin is particularly effective against Gram-positive bacteria [6] whereas thiomarinols are also effective against many Gram-negative species [1]. This increased potency may be due to: increased uptake, since the outer membrane is thought to be a barrier that protects Gram-negative bacteria; the targeting of more than one cellular function, since the pyrrothine moiety in the form of holomycin and thiolutein inhibits RNA synthesis [7] rather than protein synthesis which is the ultimate target of mupirocin; or increased activity against the normal target for mupirocin, isoleucyl-tRNA synthetase (IleS) [10].

The purpose of this work was to determine what mechanism brings together the products of these two pathways and establish whether this reveals a strategy for creating new hybrid molecules that may have useful biological activities. The results reveal a novel plasmid that is devoted almost entirely to carriage of these two biosynthetic

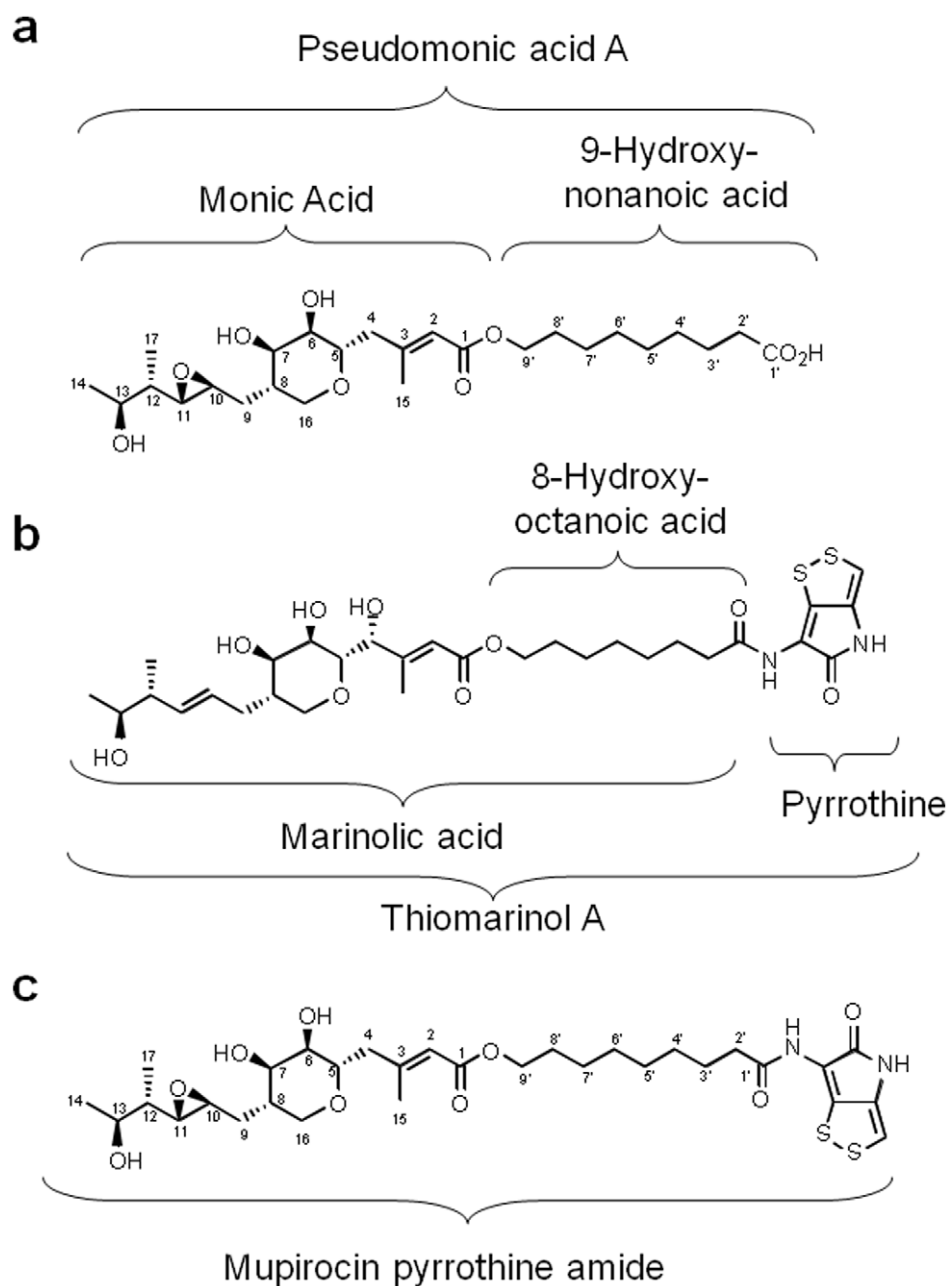

**Figure 1. Chemical structures of A pseudomonic acid A (mupirocin) and B thiomarinol A.** Holomycin is the amide *N*-acetylpyrrothine. In addition to thiomarinol, producer-bacteria generate a variety of fatty acyl pyrrothine analogues. The new hybrids created consist of pseudomonic acid **A** with pyrrothine joined via an amide bond as in **B** to create the mupirocin pyrrothine amides **C**.  
doi:10.1371/journal.pone.0018031.g001

pathways and indicate not only new mutasynthesis pathways but a paradigm for generating new strains that combines the products of different pathways and creates more potent bioactive molecules.

## Results

### The thiomarinol biosynthetic genes are encoded on a plasmid

To identify the genes for thiomarinol biosynthesis we sequenced total DNA from the producer organism, *Pseudoalteromonas* sp SANK 73390. One of the 273 contigs obtained (approximately 97 kb) encoded many genes with similarity to those of the *mup* cluster (Figure 2). As part of preliminary work we had used degenerate

primers, designed on the basis of conserved segments of the mupirocin ketosynthase (KS) coding regions, to amplify putative thiomarinol KS sequences as described in Materials and Methods. This had yielded a number of products which were sequenced and one of these which matched part of the largest polyketide (PKS) gene (*tmpD*) was used for suicide mutagenesis using vector pAKE604 [13]. Mutants showed reduced antibacterial activity and LCMS analysis confirmed the loss of thiomarinol production, but continued production of pyrrothine-containing compounds (Figure 3).

Further analysis of this contig showed that it constitutes a circular plasmid which we designate pTML1 (Figure 2). The evidence for it being a circular plasmid is as follows. First, the

The absence of mAcpE, implicated in the last steps of pseudomonic acid production [16], but an extra module (KS and ACP) in TmpB, suggests that all late tailoring steps may happen on TmpB (Figure 5). There is a clear conservation of the PKS and associated parts of the biosynthesis clusters for mupirocin and thiomarinol (Figure 4). However, a high degree of sequence divergence between the predicted products of each ORF (the level of sequence identity varies from approximately 40% to 60% identity in amino acid sequence alignments, although the identity

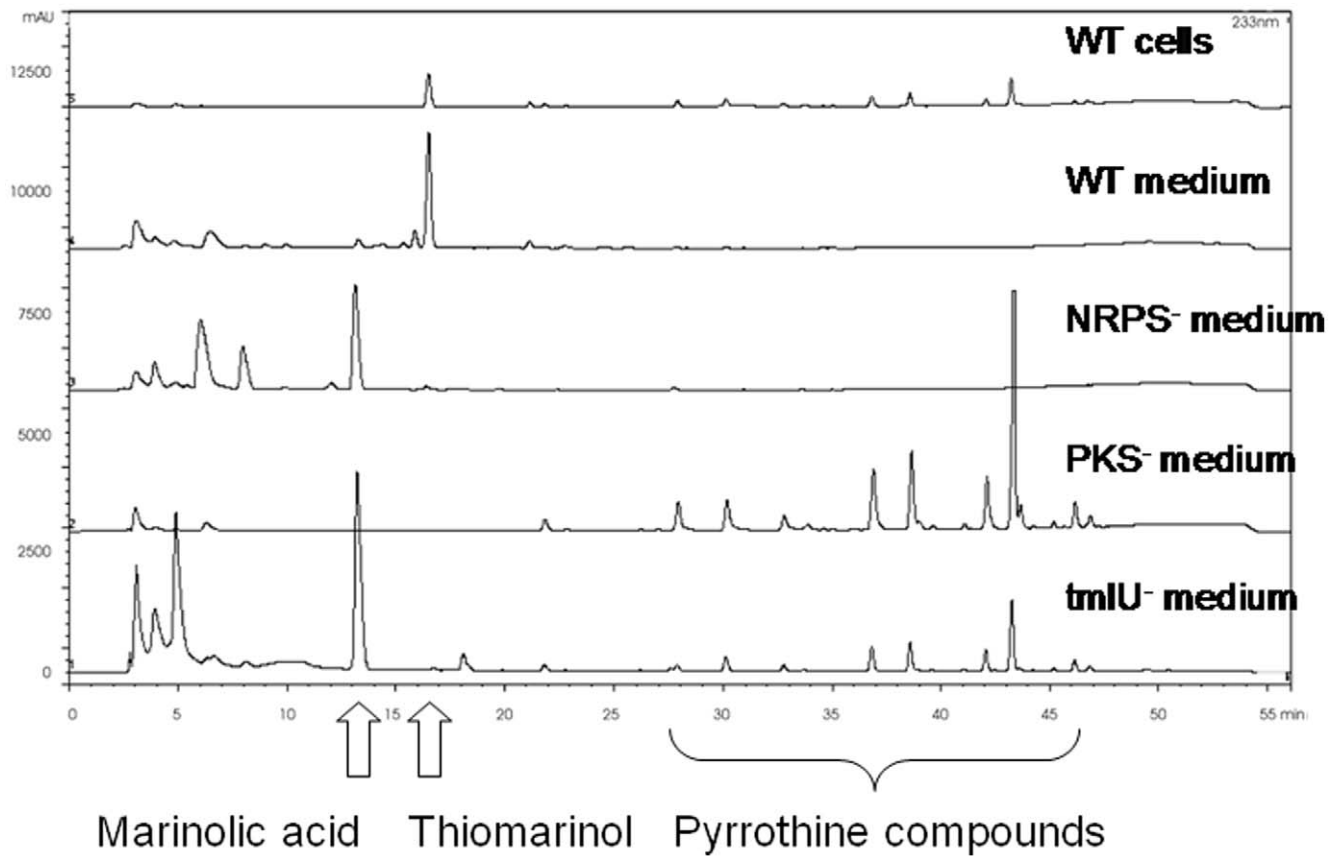

**Figure 3. HPLC analysis of products from wild type *Pseudoalteromonas rava* SANK 73390 and mutant derivatives.** In the wild type the majority of thiomarinol is present in the medium while significant levels of aliphatic pyrrothines are associated with the cells. The results show that: in the KS<sup>-</sup> mutant, only the acyl pyrrothines are produced; in the NRPS<sup>-</sup> mutant only marinolic acid is produced; and that in the *tmlU* mutant, both marinolic acid and acyl pyrrothines are produced by thiomarinol itself is not produced.  
doi:10.1371/journal.pone.0018031.g003

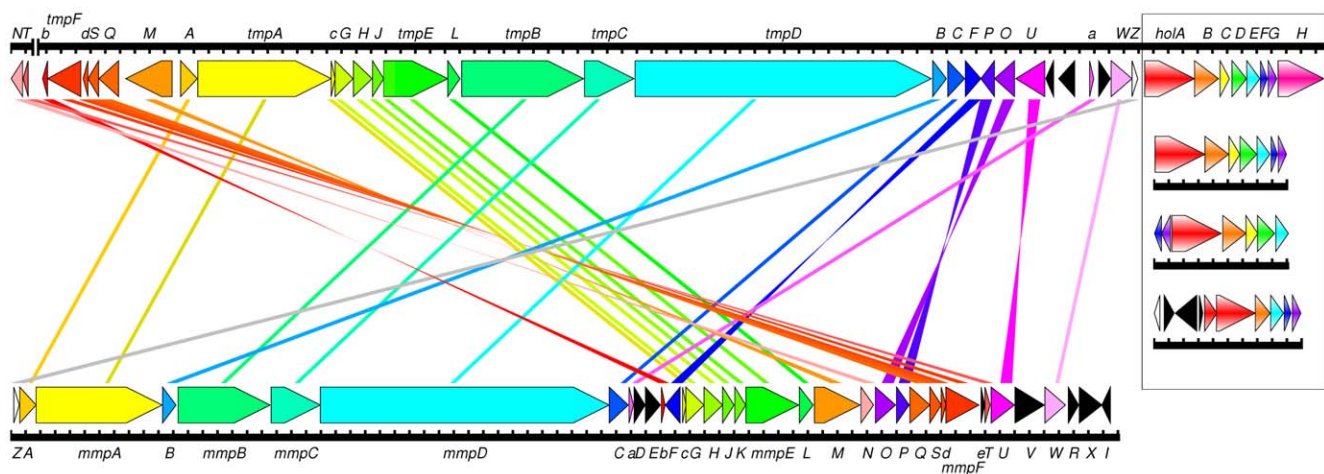

**Figure 4. Comparison of the organisation of the thiomarinol gene cluster (upper line) with the mupirocin biosynthesis gene cluster from *Pseudomonas fluorescens* (lower line) and (boxed, on right) with related NRPS clusters from (top to bottom) *Yersinia ruckeri* ATCC29473, *Streptomyces clavuligerus* ATCC27064 and *Photorhabdus asymbiotica* ATCC43949.** Lines connecting orfs are simply to help identify equivalent genes and do not indicate the degree of relatedness. A full map of pTML1 is shown in Figure 2. *macpE* (labelled "e"), which is critically missing from the thiomarinol cluster, lies between *mmpF* and *mupT*.  
doi:10.1371/journal.pone.0018031.g004

is locally higher in functionally constrained regions, Table S1) is observed. This raises intriguing questions about whether there will be functional cross-complementation between the pathways, an issue that will be investigated in a future publication.

A particularly exciting feature of the gene cluster was a group of seven orfs with similarities to several putative non-ribosomal peptide synthetase (NRPS) gene clusters which until very recently had no assigned product(s). These include clusters from *Streptomyces clavuligerus* (genome sequence of strain ATCC 27064, accession numbers EDY50341 and ADWJ01000000 [17]) that makes holomycin [7–9] and *Photobacterium assymbiotica* [18] and *Yersinia ruckeri* ATTC43949 [19] that synthesize related compounds [20] (Figure 4). We therefore designated these genes *holA* (NRPS), *holB* (oxidoreductase), *holC* [thioesterase], *holD* (dehydrogenase), *holE* (acyltransferase), *holF* (oxygenase), and *holG* (decarboxylase). Functional analysis of the homologous genes from *S. clavuligerus* has recently been reported, confirming their roles but leaving significant questions [9]. For example, the encoded NRPS (HolA), which possesses active site amino acids consistent with selectivity for cysteine [21], encodes only single adenylation, thiolation (peptidyl carrier protein, PCP), and condensation domains while a dipeptide would formally require two adenylation and two PCP domains. Since the pyrrothine should start with formation of a cysteinyl-cysteine dipeptide, HolA may be an iterative NRPS as in siderophore biosynthesis [22] and could possibly work as a dimer. The function of HolH, which does not have a counterpart in the related clusters, is not known. An overview of the predicted pTML1 thiomarinol biosynthetic pathway is shown in Figure 5.

To confirm the identity of the genes encoding pyrrothine production an internal segment of *holA* was used for suicide mutagenesis, producing mutants lacking yellow pigment. LCMS of

WT bacteria showed thiomarinol A ( $m/z$  640 Da) in both whole cells and supernatant whereas the *holA* (NRPS) mutant produced only marinolic acid ( $m/z$  486 Da). Similarly the *tmpD* (PKS) mutant produced only yellow pigmented pyrrothine material (Figure 3). This confirms that marinolic acid and the pyrrothine can be made separately. TmlU shows similarity to SimL (Figure S1) that creates an amide linkage during biosynthesis of the antibiotic simocyclinone [23,24] as well as NovL which plays a similar role in novobiocin biosynthesis [25]. A mutant with an in-frame deletion in *tmlU* made both marinolic acid and pyrrothines but no thiomarinol (Figure 3) strongly suggesting a role for TmlU in joining them together.

### Mutants defective in one or other pathway can use exogenous substrates

To test for cosynthesis we co-fermented the  $\Delta tmpD$  and  $\Delta holA$  mutants. LCMS analysis confirmed that production of thiomarinol was restored. Addition of marinolic acid to the  $\Delta tmpD$  mutant also restored thiomarinol production. Furthermore, addition of pseudomonamic acid A to the  $\Delta tmpD$  mutant gave rise to two novel pyrrothine amides (Figure 1c) indicating that mutasynthesis is possible. Feeding with a range of alternative substrates reported fully elsewhere [26] showed that alternative pseudomonamic acid metabolites produced by *P. fluorescens* or amines (for example anhydroornithine) could be incorporated by  $\Delta tmpD$  and  $\Delta holA$  mutants respectively confirming the potential to create new families of hybrids.

### Thiomarinol can overcome mupirocin resistance

Plasmid-free segregants of SANK 73390 were sensitive to thiomarinol confirming that resistance requires pTML1. The *tmlM*

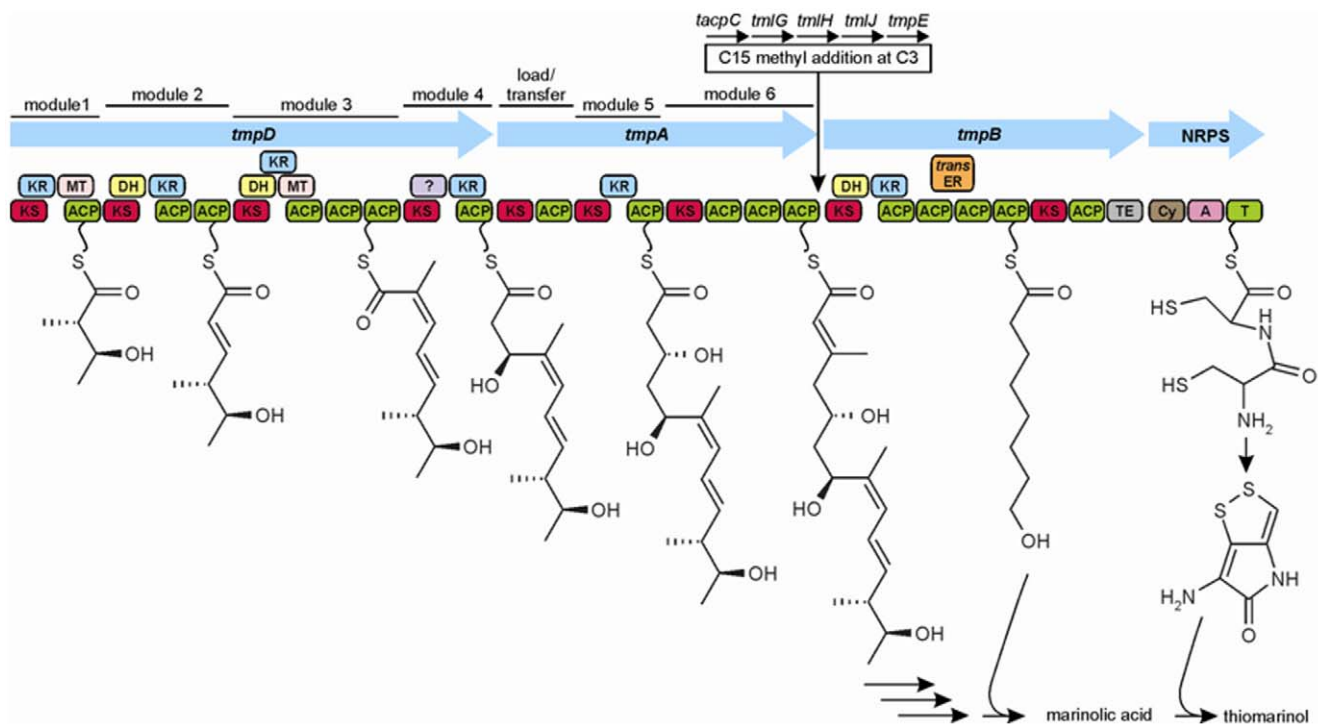

**Figure 5. Predicted biosynthetic scheme for thiomarinol biosynthesis showing the roles of TmpD (modules 1 to 4)/TnpA (modules 5 and 6) for monic acid, TmpB for 8-hydroxyoctanoic acid and HolA/NRPS for pyrrothine.** A detailed scheme for biosynthesis of the pyrrothine can be found in ref [9]. Individual functions in multifunctional proteins are shown by the colour-coded blocks: KS, Ketosynthase; ACP, Acyl Carrier Protein; KR, Ketoreductase; DH, Dehydratase; ER, Enoyl Reductase; MT, Methyl Transferase; TE, Thioesterase; C, Condensation; A, Aminoacyl Adenylation Domain; T, Thiolation Domain or Peptidyl Carrier Protein.  
doi:10.1371/journal.pone.0018031.g005

gene encodes a putative isoleucyl tRNA synthetase related to MupM that prevents suicide in the mupirocin producer [5,27] but no additional gene(s) conferring resistance to the pyrrothine element was identified. Expression of *mupM* and *tmlM* in *E. coli* under the control of the *tac* promoter and determination of thiomarinol resistance (by both plate bioassay and minimal inhibitory concentration, MIC, determination) with appropriate controls showed that *mupM* confers slight resistance to thiomarinol ( $\text{MIC} = 1 \mu\text{g ml}^{-1}$  compared to  $0.5 \mu\text{g ml}^{-1}$  for the empty vector) while *tmlM* confers high level resistance ( $\text{MIC} \geq 16 \mu\text{g ml}^{-1}$ ), suggesting that thiomarinol targets only isoleucyl tRNA synthetase. Thiomarinol was therefore tested for its ability to inhibit growth of methicillin resistant *Staphylococcus aureus* (MRSA) that had acquired high level resistance to mupirocin. A plate bioassay showed that clearly thiomarinol could inhibit growth of this strain although the clearing zone was considerably smaller than with the mupirocin sensitive strain (Figure 6). We checked by PCR that this strain carries the *S. aureus mupA* gene, that encodes an isoleucyl tRNA synthetase conferring high level mupirocin resistance, and then cloned and expressed it in *E. coli* from a context identical to that for *mupM* and *tmlM*. It also conferred resistance to mupirocin in *E. coli* ( $\text{MIC} = 50 \mu\text{g ml}^{-1}$ ) and gave partial resistance to thiomarinol ( $\text{MIC} = 2$  to  $4 \mu\text{g ml}^{-1}$ ) slightly higher than that for the *mupM* gene but was clearly inhibited at concentrations that were not inhibitory for bacteria carrying *tmlM*. Thus essentially complete resistance to thiomarinol can be conferred by an altered *ileS* gene (*tmlM*) while the mupirocin resistant *ileS* genes (*mupM* and *mupA*) only confer partial resistance.

Biological activities of a selection of the new compounds identified in this work [26] were compared by plate bioassay and minimum inhibitory concentration in liquid culture with *E. coli* and *S. aureus* (MRSA) as indicator strains. Both thiomarinol and the novel mupirocin pyrrothine amides created by feeding mupirocin as the standard mixture of pseudomonic acids, inhibited growth of both species although *S. aureus* was more sensitive ( $\text{MIC} \leq 30 \text{ ng ml}^{-1}$  compared to  $0.5 \mu\text{g ml}^{-1}$ ). Marinolic acid inhibited *S. aureus* ( $\text{MIC} = 1 \mu\text{g ml}^{-1}$ ) but less well than

mupirocin ( $\text{MIC} = 0.125 \mu\text{g ml}^{-1}$ ) confirming that the added pyrrothine is responsible for the increased potency of thiomarinol. Individual fatty acylpyrrothines isolated from *Pseudoalteromonas sp* SANK 73390 had no activity against *E. coli* and only weak activity against *S. aureus* [26]. Against MRSA carrying *mupA*, only the pyrrothine amides were active and thiomarinol ( $\text{MIC} = 8 \mu\text{g ml}^{-1}$ ) was slightly more active than the mupirocin pyrrothine amide ( $\text{MIC} = 16\text{--}32 \mu\text{g ml}^{-1}$ ). The partial resistance of mupirocin-resistant MRSA to thiomarinol is consistent with the partial resistance that *mupA* confers to thiomarinol in *E. coli*.

## Discussion

Although a variety of mechanisms allow plasmid-bearing bacteria to kill their neighbours [28] pTML1 uniquely dedicates essentially all of its large genome to making a single family of hybrid molecules which have potent antibiotic activity against both Gram-positive and Gram-negative bacteria. It may thus function as a way of providing an advantage for bacteria carrying the plasmid but the density of plasmid positive bacteria required to achieve this effect is not yet known. Antibiotic biosynthesis clusters on other plasmids are generally found as just one of a number of functions. The genes for methylenomycin occupy only about 20 kb on the 356 kb megaplasmid SCP1 in *Streptomyces coelicolor* A3 [29] while production of tropodithetic acid occupies about 10 kb on plasmids ranging from 60 to 130 kb in marine *Roseobacter* species [30]. The 211 kb plasmid pSLA2-L from *Streptomyces rochei* carries two antibiotic clusters, for lankamycin and lankacidin, among four secondary metabolite gene clusters which occupy 75% of the plasmid [31]. More recently a 1.8 Mb linear plasmid from *Streptomyces clavuligerus* was found to carry numerous secondary metabolite biosynthetic clusters [32]. A plasmid location might promote spread of these genes between hosts but surprisingly there is no evidence of conjugative transfer genes in pTML1. It is also surprising that, although there are putative operator sequences (inverted repeats shown in green, Figure 2) in the divergent promoter regions, there are no obvious candidates for regulatory proteins in the plasmid (Table S1) suggesting that regulation may be dependent on chromosomal genes and posing a potential problem for the plasmid if it were to transfer to a host that was not able to provide this function. This is doubly surprising since the mupirocin genes in *P. fluorescens* have their own quorum regulation cassette [13]. While these gene sets appear to have been acquired from different ancestors neither the average G+C content of the two gene sets nor the codon usage give any indication of this, suggesting that the genes have evolved together for some considerable time.

Our results confirm the hypothesis that both components of thiomarinol, the pseudomonic acids similar to mupirocin and the pyrrothine similar to holomycin, are synthesised by gene sets related to those that synthesise these molecules from organisms that make them independently [5,9]. Detailed comparison of the pseudomonic acid and marinolic acid biosynthesis genes reveals a number of interesting features apart from the obvious rearrangement of gene order (Figure 2).

First, there is no evidence for regulatory genes as part of the thiomarinol gene cluster and the putative operators in likely promoter regions do not show obvious similarity to the Lux boxes found in the *mup* cluster [13,33] so we can not make any predictions about mechanism, if any, by which expression is regulated.

Second, alignments of TmlA not only identify MupA but also OnnC and PedJ proteins from the onnamide and pederin pathways in which they are proposed to introduce hydroxyl

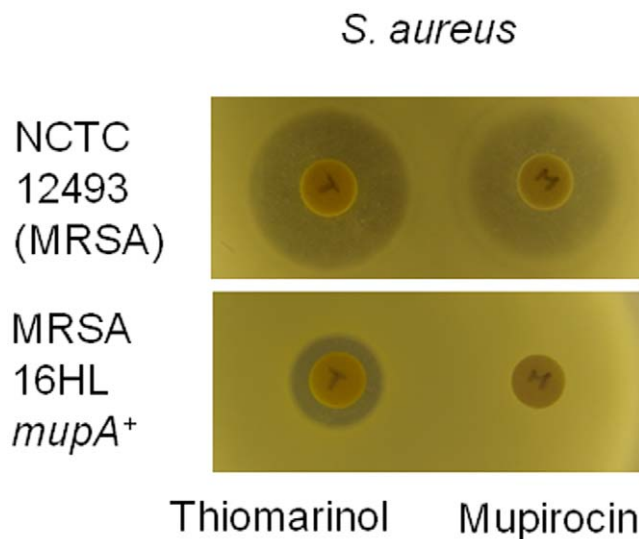

**Figure 6. Bioassay comparing the effects of thiomarinol and mupirocin against Methicillin Resistant *Staphylococcus aureus* (MRSA) and High level Mupirocin Resistant MRSA.** The loaded amount of thiomarinol was calculated as  $25 \mu\text{g}$ , and same amount of PA-A was spotted onto the paper disc "M". doi:10.1371/journal.pone.0018031.g006

groups at C7 [34,35]. Since the location of *mupA/tmlA* immediately upstream of *mmpA/tmpA* is conserved in both clusters we hypothesise that it is responsible for the C6 hydroxylation of monic acid and that this occurs while it is attached to the non-elongating module at the start of *MmpA/TmpA* [5].

Third, the hydroxymethylglutarate CoA synthase (HCS) cassette which is responsible for insertion of the C15 methyl group [36] lacks an independent gene encoding an homologue of MupK, the second hydratase (responsible for decarboxylation, the last step in the pathway), although this function seems likely to be provided by TmpE whose N-terminus aligns with MupK. In the *mup* cluster *mupK* and *mmpE* lie one after the other so a simple gene fusion could be responsible for this arrangement. However, in the kalamanticin/batumin cluster the Type I PKS Bat3 has a similar conjunction of a hydratase followed by a KS at the junction of modules 9 and 10 as part of a much larger type I PKS protein [37]. Significantly, this is where the second of four methyl insertions by the HCS cassette occurs. However, since the sequence identities with MupK (60%) and BatE (57%), its equivalent in the kalamanticin/batumin cluster, are higher than with the hydratase segment in Bat3 it seems more likely to have arisen by the proposed fusion than direct descent as a fused protein from a common ancestor with Bat3. An additional inference from this fusion, based on the assumption that most parts of the biosynthetic factory are tethered in an orderly assembly, is that the action of the KS and any additional functions of TmpE may normally be performed at the same stage of biosynthesis that the HCS cassette works (i.e. at completion of the monic acid backbone).

Fourth, the only gene in the *mup* cluster that does not have an equivalent in the thiomarinol biosynthetic cluster is *macpE*, that is essential for pseudomonic acid A production but not pseudomonic acid B [16]. In the *mup* cluster we have proposed that MupU is responsible for transferring an intermediate to MAcP where it is processed by MupO,V,C and F [33]. However, TmpB has an extra KS and ACP that MmpB does not have, while TmlU clearly has a role that is different from, or additional to, the role of MupU in transferring an intermediate to MAcP suggesting the possibility that the final processing to produce thiomarinol happens on TmpB before release by the action of the TmpB TE. This could mean that there is less potential for leakiness (release before completion of all biosynthetic steps) at this stage of biosynthesis which might explain why thiomarinol G, the equivalent of pseudomonic acid B (hydroxylated at C9; Figure 1), is hardly detectable (AM, unpublished). Work to test this hypothesis is underway.

The identification of a single thiomarinol resistance gene, *tmlM*, encoded on pTML1 and the finding that this gene is sufficient to confer high level (essentially complete) thiomarinol resistance indicated that the enhanced activity of thiomarinol compared to mupirocin is most likely due to an increased ability to bind to and inhibit isoleucyl tRNA synthetase rather than activity against a second target. This also indicates that the ability of thiomarinol to inhibit the growth of bacteria carrying the mupirocin resistant isoleucyl tRNA synthetases encoded by either *mupM* from the *P. fluorescens* mupirocin-producer strain NCIMB10586 or *mupA* from *S. aureus* is likely to be due to this increased potency against these IleS enzymes rather than the inhibition of a second target. This is also consistent with the finding that the potency of thiomarinol is destroyed by hydrolysis of the amide bond which indicates that the molecule must remain intact to exert its effect. An alternative explanation, that the hybrid is hydrolysed to its component parts after entry and that these work separately, is not consistent with the data. The results

therefore provide justification for exploration of alternative additions to the carboxylic acid end of pseudomonic acid in order to identify ways to overcome mupirocin resistant enzymes. Interestingly, MupM is not the closest relative of TmlM, there being many other homologues from other prokaryotes as well as from higher eukaryotes that are much closer in sequence. Whether this indicates selective pressure or horizontal gene transfer and recombination is not clear.

This is the first documented example of independent pathways to known antibiotics combining to create a hybrid, although antibiotics simocyclinone [38] and onnamide [35] are built from sub-pathways. Our data show that the added pyrroline increases potency of marinolic/pseudomonic acid against isoleucyl tRNA synthetase, overcoming resistance to mupirocin in contrast to chemical modifications explored previously [39]. We identified a gene *tmlU* that is required for formation of the amide. The product of this gene belongs to a growing family of amide synthases [22–24] that provide important potential for creating diverse hybrid molecules [40]. It may allow second site interactions that strengthen binding as proposed for simocyclinone with DNA gyrase [41]. In combination with the crystal structure of isoleucyl tRNA synthetase with mupirocin [42] our data provide the basis for generating new families of compounds that may be useful against MRSA.

## Materials and Methods

*Pseudoalteromonas* sp SANK 73390 and *E. coli* strains were grown on Marine broth/agar [1] at 23°C, *Escherichia coli* DH5 $\alpha$  and S17-1 were grown on L Broth or L agar at 37°C [43] and *Staphylococcus aureus* NCTC 12493 and 16HLMupR1 were grown on Mueller Hinton II broth/agar at 37°C. Cloning vector pGEM-T (www.promega.com) and suicide plasmid pAKE604 [13] were described previously.

Genomic and plasmid DNA isolation, manipulation, transformation and analysis were carried out by standard procedures [43]. The genome sequencing was performed at the Liverpool Microarray Facility at University of Liverpool using a 454 Titanium FLX kit and hardware. Automated assembly into contigs was achieved using 454 Newbler assembler software and finishing was directed by Phred/Phrap/Consed software, PCR with primers from Sigma and sequencing in the University of Birmingham Genomics lab using an ABI 3700 capillary sequencer. Sequence analysis and annotation used Artemis/ACT software as well as <http://www.nii.res.in/nrps-pks.html> which are specific for PKS/Non Ribosomal Peptide Synthetase functions. To confirm that the putative IS element is a single copy and does not represent a segment flanked by two copies PCR was performed with primers that hybridise in the unique segments on either side (5' -TCCCTTGCTAGTGTCATAG -3' and 5'-AGGCTT-GAGTCAGATTAAGTCT-3').

Gene knockouts were performed as described previously using suicide plasmid pAKE604 [13] into which we cloned selected segments from the target genes, mobilising to SANK 73390 via *E. coli* strain S17-1. For the KS (*tmpD*) knockout a 1 kb segment corresponding to position 5182 to 6158 in *tmpD* (KS-D2) which had been amplified with degenerate primers (5' - ATGGAYCCB-CAGSARCGYYTGTT -3' and 5' - TTYGGBKYCGGCGG-KRCSAAYGC -3') was used. For the NRPS knockout a 480 bp segment corresponding to positions 1509 to 1990 using specific primers (5'- CCAGAATTCGATGCAAATGCTAGGCT -3' incorporating a EcoRI site and 5'- AGCTAAAGCTTC-TAGTTCTGCAACTC -3' incorporating a HindIII site) was used. For the *tmlU* knockout an in-frame deletion was created by

using PCR to generate upstream (5'- TTTAGTCTAGATAG-GCGCAACCTT G -3' incorporating an XbaI site and 5'-CGGGAAAACGCTGCAGAAATGGATG -3' incorporating a PstI site) and downstream (5'- CGTTTACTGCAGTGCTCG-CTGAGC -3' incorporating a PstI site and 5'- ATAGCCC-TGTCGACCGTACCCAA -3' incorporating a SalI site) arms that were joined via the common PstI site and cloned into pAKE604.

Antibiotic plate bioassay was performed as described previously [5]. Expression constructs for *mupM*, *tmlM* and *mupA* (from *S. aureus*) were constructed based on *tac* promoter expression vector pJH10 [5]. In addition, thiomarinol was extracted from 2 day cultures of SANK 73390 and dried onto filter paper discs that were placed on bacterial lawns. HPLC and mass spectrometric analysis of bacterial products were performed as described elsewhere [44].

## Supporting Information

**Figure S1 Alignment of the amino acid sequences of TmlU, SimL (AAG34183) and NovL (AAF67505).** (TIF)

## References

- Shiozawa H, Kagasaki T, Kinoshita T, Haruyama H, Domon H, et al. (1993) Thiomarinol, a new hybrid antimicrobial antibiotic produced by a marine bacterium fermentation, isolation, structure, and antimicrobial activity. *J Antibiotics* 46: 1834–1842.
- Shiozawa H, Takahashi S (1994) Configurational studies on thiomarinol. *J Antibiotics* 47: 851–853.
- Shiozawa H, Kagasaki T, Torikata A, Tanaka N, Fujimoto, K, et al. (1995) Thiomarinol-B and Thiomarinol-C, new antimicrobial antibiotics produced by a marine bacterium. *J Antibiotics* 48: 907–909.
- Shiozawa H, Shimada A, Takahashi S (1997) Thiomarinols D, E, F and G, new hybrid antimicrobial antibiotics produced by a marine bacterium; Isolation, structure, and antimicrobial activity. *J Antibiotics* 50: 449–452.
- El-Sayed AK, Hotherhall J, Cooper SM, Stephens E, Simpson TJ, et al. (2003) Characterization of the mupirocin biosynthesis gene cluster from *Pseudomonas fluorescens* NCIMB 10586. *Chem Biol* 10: 419–430.
- Thomas CM, Hotherhall J, Willis CL, Simpson TJ (2010) Resistance to and synthesis of the antibiotic mupirocin. *Nat Rev Microbiol* 8: 281–289.
- Oliva B, O'Neill A, Wilson JM, O'Hanlon PJ, Chopra I (2001) Antimicrobial properties and mode of action of the pyrroline holomycin. *Antimicrob Ag Chemother* 45: 532–539.
- Okamura K, Soga Y, Shimauchi T, Ishikura J (1977) Holomycin and N-propionyl-holothin, antibiotics produced by a Cephamycin C producer antibiotics 30: 334–336.
- Li B, Walsh CT (2010) Identification of the gene cluster for the dithiopyrrolone antibiotic holomycin in *Streptomyces clavuligerus*. *Proc Natl Acad Sci USA* 107: 19731–19735.
- Hughes J, Mellows G (1978) Inhibition of Isoleucyl-Transfer Ribonucleic-Acid Synthetase in *Escherichia coli* by Pseudomonic Acid. *Biochem J* 176: 305–318.
- Tang GL, Cheng YQ, Shen B (2004) Leinamycin biosynthesis revealing unprecedented architectural complexity for a hybrid polyketide synthase and nonribosomal peptide synthetase. *Chem Biol* 11: 33–45.
- Aron ZD, Fortin PD, Calderone CT, Walsh CT (2007) FenF: Servicing the mycosubtilin synthetase assembly line *in trans*. *ChemBioChem* 8: 613–616.
- El-Sayed AK, Hotherhall J, Thomas CM (2001) Quorum-sensing-dependent regulation of biosynthesis of the polyketide antibiotic mupirocin in *Pseudomonas fluorescens* NCIMB 10586. *Microbiol SGM* 147: 2127–2139.
- Medigue C, Krin E, Pascal G, Barbe V, Bernsel A, et al. (2005) Coping with cold: the genome of the versatile marine Antarctica bacterium *Pseudoalteromonas haloplanktis* TAC125. *Genome Res* 15: 1325–1335.
- Rahman AS, Hotherhall J, Crosby J, Simpson TJ, Thomas CM (2005) Tandemly duplicated acyl carrier proteins, which increase polyketide antibiotic production, can apparently function either in parallel or in series. *J Biol Chem* 280: 6399–6408.
- Cooper SM, Laosripaiboon W, Rahman AS, Hotherhall J, El-Sayed AK, et al. (2005) Shift to pseudomonic acid B production in *P. fluorescens* NCIMB10586 by mutation of mupirocin tailoring genes *mupO*, *mupU*, *mupV* and *macpE*. *Chem Biol* 12: 825–833.
- Song JY, Jeong H, Yu DS, Fischbach MA, Park HS, Kim JJ, et al. (2010) Draft genome sequence of *Streptomyces clavuligerus* NRRL 3585, a producer of diverse secondary metabolites. *J Bacteriol* 192: 6317–6318.
- Wilkinson P, Waterfield NR, Crossman L, Corton C, Sanchez-Contreras M, et al. (2009) Comparative genomics of the emerging human pathogen

**Table S1 Predicted gene products of pTML1.** (DOC)

## Acknowledgments

Strain SANK 73390 was provided by Daiichi Sankyo Co., Ltd. MRSA strains were provided by Katie Hardy and Peter Hawkey, Heart of England NHS Trust, Birmingham. We thank Claire Riemer, Rob Marshall and Amreen Ahmed for producing some of the MIC data.

## Author Contributions

Conceived and designed the experiments: CMT TJS CLW RJC JC ASH DF JH ACM. Performed the experiments: DF ASH ACM ZS ERS JH CMT ERS RG. Analyzed the data: DF ASH ACM ZS JH TJS CW JC RJC RG CMT. Contributed reagents/materials/analysis tools: DF ASH TJS CMT. Wrote the paper: CMT DF ASH JH ACM ZS TJS CLW RJC JC RG. Obtained permission to use the bacterial strain: DF CMT. Obtained permission from Daiichi Sankyo to publish the content: DF.

- Photorhabdus asymbiotica* with the insect pathogen *Photorhabdus luminescens*. *BMC Genomics* 10: 302.
- Chen PE, Cook C, Stewart AC, Nagarajan N, Sommer DD, et al. (2010) Genomic characterization of the *Tersinia* genus. *Genome Biology* 11, R1.
  - Bode KB (2009) Entomopathogenic bacteria as a source of secondary metabolites. *Curr Op Chem Biol* 13: 224–230.
  - Challis GL, Ravel J, Townsend CA (2000) Predictive, structure-based model of amino acid recognition by nonribosomal peptide synthetase adenylation domains. *Chem Biol* 7: 211–224.
  - Bushley KE, Ripoll DR, Turgeon BG (2008) Module evolution and substrate specificity of fungal nonribosomal peptide synthetases involved in siderophore biosynthesis. *BMC Evol Biol* 8: 328.
  - Luft T, Li SM, Scheible H, Kammerer B, Heide L (2005) Overexpression, purification and characterization of SimL, an amide synthetase involved in simocyclinone biosynthesis. *Arch Microbiol* 183: 277–285.
  - Pacholec M, Meyers CLF, Oberthur M, Kahne D, Walsh CT (2005) Characterization of the aminocoumarin ligase SimL from the simocyclinone pathway and tandem incubation with NovM,P,N from the novobiocin pathway. *Biochemistry* 44: 4949–4956.
  - Steffensky M, Li SM, Heide L (2004) Cloning, overexpression, and purification of novobiocin acid synthetase from *Streptomyces spheroides* NCIMB 11891. *J Biol Chem* 275: 21754–21760.
  - Murphy AC, Fukuda D, Song Z, Hotherhall J, Cox RJ, et al. (2011) Novel Thiomarinol antibiotics active against MRSA are generated by mutagenesis and mutasynthesis of *Pseudoalteromonas* SANK 73390. *Angewandte Chemie Int Ed* 50: in press.
  - Yanagisawa T, Kawakami M (2003) How does *Pseudomonas fluorescens* avoid suicide from its antibiotic pseudomonic acid? Evidence for two evolutionarily distinct isoleucyl-tRNA synthetases conferring self-defense. *J Biol Chem* 278: 25887–25894.
  - Jezirowski A, Gordon DM (2007) Evolution of microcin V and colicin Ia plasmids in *Escherichia coli*. *J Bacteriol* 189: 7045–7052.
  - Bentley SD, Brown S, Murphy LD, Harris DE, Quail MA, et al. (2004) SCP1, a 356,023 bp linear plasmid adapted to the ecology and developmental biology of its host, *Streptomyces coelicolor* A3(2). *Mol Microbiol* 51: 1615–1628.
  - Geng HF, Bruhn JB, Nielsen KF, Gram L, Belas R (2008) Genetic dissection of tropodithietic acid biosynthesis by marine roseobacters. *App Env Microbiol* 74: 1535–1545.
  - Mochizuki S, Hiratsu K, Suwa M, Ishii T, Sugino F, et al. (2003) The large linear plasmid pSLA2-L of *Streptomyces rochei* has an unusually condensed gene organization for secondary metabolism. *Mol Microbiol* 48: 1501–1510.
  - Medema MH, Trefzer A, Kovalchuk A, van den Berg M, Muller U, et al. (2010) The Sequence of a 1.8-Mb Bacterial Linear Plasmid Reveals a Rich Evolutionary Reservoir of Secondary Metabolic Pathways. *Genome Biol Evol* 2: 212–224.
  - Hotherhall J, Wu J, Rahman AS, Shields JA, Haddock J, et al. (2007) Mutational analysis reveals that all tailoring region genes are required for production of polyketide antibiotic mupirocin by *Pseudomonas fluorescens* - Pseudomonic Acid B biosynthesis precedes Pseudomonic Acid A. *J Biol Chem* 282: 15451–15461.
  - Piel J (2002) A polyketide synthase-peptide synthetase gene cluster from an uncultured bacterial symbiont of Paederus beetles. *Proc Natl Acad Sci USA Proc Natl Acad Sci USA* 99: 14002–14007.

35. Piel J, Hui DQ, Wen GP, Butzke D, Platzer M, et al. (2004) Antitumor polyketide biosynthesis by an uncultivated bacterial symbiont of the marine sponge *Theonella swinhoei*. *Proc Natl Acad Sci USA* 101: 16222–16227.
36. Wu J, Cooper SM, Cox RJ, Crosby J, Hothersall J, et al. (2007) Mupirocin H, a novel metabolite resulting from mutation of the HMG-CoA synthase analogue MupH in *Pseudomonas fluorescens*. *Chem Comm* 2007: 2040–2042.
37. Mattheus W, Gao LJ, Herdewijn P, Landuyt B, Verhaegen J, et al. (2010) Isolation and purification of a new kalimantacin/batumin-related polyketide antibiotic and elucidation of its biosynthesis gene cluster. *Chem Biol* 17: 149–159.
38. Trefzer A, Pelzer S, Schimana J, Stockert S, Bihlmaier C, et al. (2002) Biosynthetic gene cluster of simocyclinone, a natural multihybrid antibiotic. *Antimicrob Ag Chemother* 46: 1174–1182.
39. Brown P, Best DJ, Broom NJP, Cassels R, O'hlanon PJ, et al. (1997) The chemistry of pseudomonic acid.18. Heterocyclic replacement of the alpha,beta-unsaturated ester: Synthesis, molecular modelling, and antibacterial activity. *J Med Chem* 40: 2563–2570.
40. Galm U, Dessoy MA, Schmidt J, Wessjohann LA, Heide L (2004) *In vitro* and *in vivo* production of new aminocoumarins by a combined biochemical, genetic, and synthetic approach. *Chem Biol* 11: 173–183.
41. Edwards MJ, Flatman RH, Mitchenall LA, Stevenson CEM, Le TBK, et al. (2009) A crystal structure of the bifunctional antibiotic Simocyclinone D8, bound to DNA Gyrase. *Science* 326: 1415–1418.
42. Silvan LF, Wang JM, Steitz TA (1999) Insights into editing from an Ile-tRNA synthetase structure with tRNA(Ile) and mupirocin. *Science* 285: 1074–1077.
43. Sambrook J, Russell DW (2001) *Molecular cloning: a laboratory manual*. New York: CSHL Press.
44. Cooper SM, Cox RJ, Crosby J, Crump MP, Hothersall J, et al. (2005) Mupirocin W, a novel pseudomonic acid produced by targeted mutation of the mupirocin biosynthetic gene cluster. *Chemical Communications* 2005: 1179–1181.
